# Supplementary material for: Association of Bone Metastatic Burden With Survival Benefit From Prostate Radiotherapy in Patients With Newly Diagnosed Metastatic Prostate Cancer: A Secondary Analysis of a Randomized Clinical Trial
Source: PubMed Central journal article supplement (PMC7893550; doi:10.1001/jamaoncol.2020.7857), 2021-02-18
Supplement: jamaoncol-e207857-s002.pdf [file jamaoncol-e207857-s002.pdf]

## Supplemental Online Content

Ali SA, Hoyle A, Haran AM, et al. Association of bone metastatic burden with survival benefit from prostate radiotherapy in patients with newly diagnosed metastatic prostate cancer: a secondary analysis of a randomized clinical trial. *JAMA Oncol*. Published online February 18, 2021. doi:10.1001/jamaoncol.2020.7857

### eMethods.

### eResults.

**eTable 1.** Baseline characteristics of 1939 patients by treatment included in this study.

**eTable 2.** Baseline characteristics of patients randomized in the STAMPEDE M1|RT comparison and the patients included in this study, by treatment.

**eTable 3.** Bayesian Information Criterion (BIC) and Akaike Information Criterion (AIC) for models evaluating interaction of treatment with linear, FP1 and FP2 functions of bone metastasis count.

**eTable 4.** Summary of estimated treatment effects for overall and failure-free survival, for all 1939 patients in subgroups based on  $\leq 3$ , 4 to 7 and  $> 7$  bone metastases.

**eTable 5.** Baseline characteristics of 1587 patients with bone metastases ( $\pm$ NRLN) and without visceral metastasis stratified by  $\leq 3$  and  $\geq 4$  bone metastasis, by treatment.

**eTable 6.** Summary of estimated treatment effects for each outcome measure, for all 1272 patients with only bone metastasis and in subgroups based on  $\leq 3$  and  $\geq 4$  bone metastases.

**eTable 7.** Baseline characteristics of 181 patients with only non-regional lymph node metastasis (M1a), by treatment.

**eTable 8.** Baseline characteristics of 171 patients with any visceral or other metastasis, by treatment arms.

**eTable 9.** Summary of treatment effects for each outcome measure by the newly devised metastatic burden criteria.

**eFigure 1.** Hazard ratios and 95% confidence intervals for overall and failure-free survival in non-overlapping sub-populations based on bone metastases count for 1939 patients.

**eFigure 2.** Kaplan-Meier estimated 3-year (A) overall and (B) failure free survival in non-overlapping sub-populations based on bone metastases count for 1939 patients.

**eFigure 3.** Kaplan-Meier curves for overall and failure-free survival by treatment in 1272 patients with only bone metastasis and no non-regional lymph node/visceral/other metastasis stratified by (A,B)  $\leq 3$  and (C,D)  $\geq 4$  bone metastases.

**eFigure 4.** Kaplan-Meier curves for overall and failure-free survival in the newly devised (A,B) low and (C,D) high metastatic burden subgroups.

**eFigure 5.** Effect of prostate radiotherapy on overall survival across baseline factors in low and high metastatic burden subgroups.

**eFigure 6.** Effect of prostate radiotherapy on failure-free survival across baseline factors in low and high metastatic burden subgroups.

### eReferences.

This supplemental material has been provided by the authors to give readers additional information about their work.

## eMethods.

### Secondary outcome measures

Secondary outcome measures evaluated included progression-free survival (PFS) defined as FFS without biochemical events, metastatic progression-free survival (mPFS) defined as time from randomisation to new metastases or progression of existing metastases or death and prostate cancer-specific survival (PCSS). Patients without the event of interest were censored at the time last known to be event-free. The outcomes dataset frozen for the published STAMPEDE “M1|RT comparison” was used for survival analyses.<sup>1</sup>

### Statistical analyses

To evaluate treatment and bone metastasis interaction on a continuous scale, the multivariable fractional polynomial interaction (MFPI) approach was utilized. The MFPI algorithm is an extension of the MFP algorithm based on fractional polynomial analysis of continuous predictors.<sup>2,3</sup> This approach for detecting interactions between treatment and a continuous variable avoids the assumption of linearity and arbitrary categorization.<sup>4,5</sup> It aims to use all information from a continuous variable while allowing for possible non-linearity using first (FP1) and second degree (FP2) fractional polynomial transformations of the continuous variable. Interaction of treatment with linear, FP1 and FP2 functions of bone metastasis counts were evaluated using nested Cox models adjusted for minimisation factors used at randomisation: age (<70 or ≥70), N stage (N0, N+ or NX), WHO PS (0 or 1-2), NSAID or aspirin use (uses either or no) and planned docetaxel use (yes or no) along with metastatic site (only NRLN metastasis, bone±NRLN metastasis or any visceral/other metastasis). Despite the benefits of the fractional polynomial approach, overfitting of interaction terms with FP2 transformations is a real concern.<sup>6</sup> Such overfitting can be avoided by selecting a simplified model based on Bayesian Information Criteria (BIC) and Akaike Information Criteria (AIC).<sup>6-8</sup> To guard against such overfitting, model with the lowest BIC was preferred. Model comparison was performed using the BIC adapted for censored data which corrects for number of events rather than sample size.<sup>9</sup> Differences between BIC ( $\Delta$ BIC) values for two models were interpreted as per the BIC evidence grades presented by Raftery.<sup>10</sup> Selection based on BIC was verified using the Akaike information criteria (AIC).<sup>8</sup> A p-value from a likelihood ratio test of the interaction between treatment group and bone metastasis count is presented. The MFPI model-estimated treatment effect as a function of bone metastasis count was plotted graphically on the HR scale with 95%CI. Further details regarding the MFPI have been published previously.<sup>2,6</sup>

In the newly devised low and high metastatic burden subgroups, we evaluated treatment effects for primary and secondary outcome measures. Adjusted Cox proportional hazards regression models were used to estimate relative treatment effects. Flexible parametric models fitted using (5,5) degrees of freedom with adjustment variables as specified above were used to generate 3-year survival estimates. Restricted mean survival time (RMST) were evaluated using a t-star of 59 months as determined by the Royston and Parmar method.<sup>11</sup> Fine and Gray regression models were used for competing risk analysis of prostate cancer-specific survival.<sup>12</sup> Consistency of treatment effect within the low and high burden subgroups was explored across selected baseline characteristics of clinical relevance: patient age (<70 or ≥70), pre-ADT PSA (quartiles), WHO performance status (0 or 1-2), Gleason sum score (≤7, 8-10 or unknown), tumour stage (≤T2, T3 or T4), regional nodal status (N0, N1 or NX), nominated RT schedule (36 Gy/6f/6 weeks or 55 Gy/20f/4 weeks) and planned docetaxel use (No or Yes). A HR below 1 favoured the prostate radiotherapy group. Statistical analyses were performed using Stata v15.1 (StataCorp, College Station, TX, USA).

## **eResults.**

For models evaluating the interaction between treatment and bone metastasis counts, **eTable 3** shows the BIC and AIC statistics for linear, FP1 and FP2 models. For both OS and FFS, the linear model had the lowest BIC. Also, the BIC criteria suggest that both FP1 and FP2 models were overfit ( $\Delta\text{BIC} > 6$ ) compared to the linear model. Since both the AIC and the BIC are smallest for the linear model, each criterion would select this model for OS and FFS.

The effect of treatment was heterogeneous across the newly devised metastatic burden subgroups for secondary outcome measures (interaction p-values: PFS=0.004; mPFS=0.009; PCSS=0.005) with good evidence of benefit noted for all outcome measures in patients with low metastatic burden (**eTable 9 in supplement**). In the low metastatic burden subgroup, there was good evidence that prostate RT improved PFS (HR=0.72, 95%CI 0.57 – 0.92), mPFS (HR=0.74, 95%CI 0.58 – 0.94) and PCSS (sub-HR=0.60, 95%CI 0.43 – 0.86). The absolute improvement in 3-year PFS, mPFS and PCSS was 9%, 7% and 9% respectively in patients with low metastatic burden.

eTable 1. Baseline characteristics of 1939 patients by treatment included in this study.

|                                                                                                                                                                                           | SOC<br>(n=976) |    | SOC+RT<br>(n=963) |    |
|-------------------------------------------------------------------------------------------------------------------------------------------------------------------------------------------|----------------|----|-------------------|----|
|                                                                                                                                                                                           | n              | %  | n                 | %  |
| <b>Age at randomisation</b>                                                                                                                                                               |                |    |                   |    |
| Median                                                                                                                                                                                    | 68             |    | 68                |    |
| IQR                                                                                                                                                                                       | 63-73          |    | 63-73             |    |
| <b>PSA (ng/mL) before ADT</b>                                                                                                                                                             |                |    |                   |    |
| Median                                                                                                                                                                                    | 98             |    | 98                |    |
| IQR                                                                                                                                                                                       | 31-315         |    | 33-312            |    |
| <b>WHO performance status</b>                                                                                                                                                             |                |    |                   |    |
| 0                                                                                                                                                                                         | 695            | 71 | 689               | 72 |
| 1 to 2                                                                                                                                                                                    | 281            | 29 | 274               | 29 |
| <b>Primary tumour stage</b>                                                                                                                                                               |                |    |                   |    |
| ≤T2                                                                                                                                                                                       | 89             | 9  | 94                | 10 |
| T3                                                                                                                                                                                        | 555            | 57 | 563               | 59 |
| T4                                                                                                                                                                                        | 246            | 25 | 232               | 24 |
| TX                                                                                                                                                                                        | 86             | 9  | 74                | 8  |
| <b>Gleason score</b>                                                                                                                                                                      |                |    |                   |    |
| ≤7                                                                                                                                                                                        | 161            | 17 | 165               | 17 |
| 8 to 10                                                                                                                                                                                   | 781            | 80 | 757               | 79 |
| Unknown                                                                                                                                                                                   | 34             | 4  | 41                | 4  |
| <b>Regional node status</b>                                                                                                                                                               |                |    |                   |    |
| N0                                                                                                                                                                                        | 332            | 34 | 329               | 34 |
| N1                                                                                                                                                                                        | 582            | 60 | 569               | 59 |
| NX                                                                                                                                                                                        | 62             | 6  | 65                | 7  |
| <b>Nominated RT schedule</b>                                                                                                                                                              |                |    |                   |    |
| 36Gy in 6f over 6 weeks                                                                                                                                                                   | 447            | 46 | 459               | 48 |
| 55Gy in 20f over 4 weeks                                                                                                                                                                  | 529            | 54 | 504               | 52 |
| <b>Planned Docetaxel use</b>                                                                                                                                                              |                |    |                   |    |
| No                                                                                                                                                                                        | 804            | 82 | 792               | 82 |
| Yes                                                                                                                                                                                       | 172            | 18 | 171               | 18 |
| <b>Sites of metastases</b>                                                                                                                                                                |                |    |                   |    |
| Bone                                                                                                                                                                                      | 872            | 89 | 860               | 89 |
| NRLN                                                                                                                                                                                      | 276            | 28 | 277               | 29 |
| Lung                                                                                                                                                                                      | 36             | 4  | 41                | 4  |
| Liver                                                                                                                                                                                     | 22             | 2  | 18                | 2  |
| Other                                                                                                                                                                                     | 34             | 3  | 32                | 3  |
| <b>Number of bone metastases</b>                                                                                                                                                          |                |    |                   |    |
| ≤3                                                                                                                                                                                        | 417            | 43 | 409               | 42 |
| 4 to 9                                                                                                                                                                                    | 204            | 21 | 203               | 21 |
| ≥10                                                                                                                                                                                       | 355            | 36 | 351               | 36 |
| Abbreviations: SOC – standard-of-care, RT – radiotherapy, IQR- inter-quartile range, PSA – prostate specific antigen, ADT – androgen deprivation therapy, NRLN- Non-regional lymph nodes. |                |    |                   |    |

**eTable 2. Baseline characteristics of patients randomized in the STAMPEDE M1|RT comparison and the patients included in this study, by treatment.**

|                                                                                                                                                                                           | M1 RT comparison (n=2061) |    |                 |    | Included (n=1939) |    |                |    |
|-------------------------------------------------------------------------------------------------------------------------------------------------------------------------------------------|---------------------------|----|-----------------|----|-------------------|----|----------------|----|
|                                                                                                                                                                                           | SOC (n=1029)              |    | SOC+RT (n=1032) |    | SOC (n=976)       |    | SOC+RT (n=963) |    |
|                                                                                                                                                                                           | n                         | %  | n               | %  | n                 | %  | n              | %  |
| <b>Age at randomisation</b>                                                                                                                                                               |                           |    |                 |    |                   |    |                |    |
| <b>Median</b>                                                                                                                                                                             | 68                        |    | 68              |    | 68                |    | 68             |    |
| <b>IQR</b>                                                                                                                                                                                | 63 - 73                   |    | 63-73           |    | 63-73             |    | 63-73          |    |
| <b>PSA (ng/ml) before ADT</b>                                                                                                                                                             |                           |    |                 |    |                   |    |                |    |
| <b>Median</b>                                                                                                                                                                             | 98                        |    | 97              |    | 98                |    | 98             |    |
| <b>IQR</b>                                                                                                                                                                                | 30 - 316                  |    | 33 - 313        |    | 31-315            |    | 33-312         |    |
| <b>WHO performance status</b>                                                                                                                                                             |                           |    |                 |    |                   |    |                |    |
| <b>0</b>                                                                                                                                                                                  | 732                       | 71 | 734             | 71 | 695               | 71 | 689            | 72 |
| <b>1 to 2</b>                                                                                                                                                                             | 297                       | 29 | 298             | 29 | 281               | 29 | 274            | 29 |
| <b>Primary tumour stage</b>                                                                                                                                                               |                           |    |                 |    |                   |    |                |    |
| <b>≤T2</b>                                                                                                                                                                                | 96                        | 9  | 103             | 10 | 89                | 9  | 94             | 10 |
| <b>T3</b>                                                                                                                                                                                 | 585                       | 57 | 603             | 58 | 555               | 57 | 563            | 59 |
| <b>T4</b>                                                                                                                                                                                 | 260                       | 25 | 246             | 24 | 246               | 25 | 232            | 24 |
| <b>TX</b>                                                                                                                                                                                 | 88                        | 9  | 80              | 8  | 86                | 9  | 74             | 8  |
| <b>Gleason score</b>                                                                                                                                                                      |                           |    |                 |    |                   |    |                |    |
| <b>≤7</b>                                                                                                                                                                                 | 173                       | 17 | 172             | 17 | 161               | 17 | 165            | 17 |
| <b>8 to 10</b>                                                                                                                                                                            | 820                       | 80 | 810             | 78 | 781               | 80 | 757            | 79 |
| <b>Unknown</b>                                                                                                                                                                            | 36                        | 3  | 50              | 5  | 34                | 4  | 41             | 4  |
| <b>Regional node status</b>                                                                                                                                                               |                           |    |                 |    |                   |    |                |    |
| <b>N0</b>                                                                                                                                                                                 | 345                       | 34 | 344             | 33 | 332               | 34 | 329            | 34 |
| <b>N1</b>                                                                                                                                                                                 | 620                       | 60 | 620             | 60 | 582               | 60 | 569            | 59 |
| <b>NX</b>                                                                                                                                                                                 | 64                        | 6  | 68              | 7  | 62                | 6  | 65             | 7  |
| <b>Nominated RT schedule</b>                                                                                                                                                              |                           |    |                 |    |                   |    |                |    |
| <b>36Gy in 6f over 6 weeks</b>                                                                                                                                                            | 482                       | 47 | 497             | 48 | 447               | 46 | 459            | 48 |
| <b>55Gy in 20f over 4 weeks</b>                                                                                                                                                           | 547                       | 53 | 535             | 52 | 529               | 54 | 504            | 52 |
| <b>Planned Docetaxel use</b>                                                                                                                                                              |                           |    |                 |    |                   |    |                |    |
| <b>No</b>                                                                                                                                                                                 | 845                       | 82 | 849             | 82 | 804               | 82 | 792            | 82 |
| <b>Yes</b>                                                                                                                                                                                | 184                       | 18 | 183             | 18 | 172               | 18 | 171            | 18 |
| <b>Sites of metastases</b>                                                                                                                                                                |                           |    |                 |    |                   |    |                |    |
| <b>Bone</b>                                                                                                                                                                               | 919                       | 89 | 917             | 89 | 872               | 89 | 860            | 89 |
| <b>NRLN</b>                                                                                                                                                                               | 294                       | 29 | 304             | 29 | 276               | 28 | 277            | 29 |
| <b>Lung</b>                                                                                                                                                                               | 42                        | 4  | 48              | 5  | 36                | 4  | 41             | 4  |
| <b>Liver</b>                                                                                                                                                                              | 23                        | 2  | 19              | 2  | 22                | 2  | 18             | 2  |
| <b>Other</b>                                                                                                                                                                              | 35                        | 3  | 33              | 3  | 34                | 3  | 32             | 3  |
| Abbreviations: SOC – standard of care, RT – radiotherapy, IQR- inter-quartile range, PSA – prostate specific antigen, ADT – androgen deprivation therapy, NRLN- Non-regional lymph nodes. |                           |    |                 |    |                   |    |                |    |

**eTable 3. Bayesian Information Criterion (BIC) and Akaike Information Criterion (AIC) for models evaluating interaction of treatment with linear, FP1 and FP2 functions of bone metastasis count.**

| <b>Outcome evaluated</b>     | <b>Model class</b> | <b>BIC</b> | <b>AIC</b> |
|------------------------------|--------------------|------------|------------|
| <b>Overall survival</b>      |                    |            |            |
|                              | <b>Linear</b>      | 9782.17    | 9768.46    |
|                              | <b>FP1</b>         | 9788.88    | 9770.59    |
|                              | <b>FP2</b>         | 9801.80    | 9769.79    |
| <b>Failure-free survival</b> |                    |            |            |
|                              | <b>Linear</b>      | 17810.99   | 17795.45   |
|                              | <b>FP1</b>         | 17818.17   | 17797.45   |
|                              | <b>FP2</b>         | 17838.25   | 17801.99   |

**eTable 4. Summary of estimated treatment effects for overall and failure-free survival, for all 1939 patients in subgroups based on ≤3, 4 to 7 and >7 bone metastases.**

|                                                                                                                                                                                                                                                                                                               | Events/patients |         | HR (95%CI) <sup>a</sup> | 3-year KM survival % |        |
|---------------------------------------------------------------------------------------------------------------------------------------------------------------------------------------------------------------------------------------------------------------------------------------------------------------|-----------------|---------|-------------------------|----------------------|--------|
|                                                                                                                                                                                                                                                                                                               | SOC             | SOC+RT  |                         | SOC                  | SOC+RT |
| <b>Overall survival</b>                                                                                                                                                                                                                                                                                       |                 |         |                         |                      |        |
| ≤3 bone metastases                                                                                                                                                                                                                                                                                            | 123/417         | 89/409  | 0.65 (0.49-0.85)        | 73%                  | 83%    |
| ≥4 and ≤7 bone metastases                                                                                                                                                                                                                                                                                     | 53/180          | 63/168  | 1.39 (0.96-2.00)        | 69%                  | 62%    |
| >7 bone metastases                                                                                                                                                                                                                                                                                            | 192/379         | 195/386 | 1.03 (0.84-1.25)        | 46%                  | 47%    |
| <b>Failure-free survival</b>                                                                                                                                                                                                                                                                                  |                 |         |                         |                      |        |
| ≤3 bone metastases                                                                                                                                                                                                                                                                                            | 266/417         | 199/409 | 0.60 (0.50-0.72)        | 31%                  | 51%    |
| ≥4 and ≤7 bone metastases                                                                                                                                                                                                                                                                                     | 121/180         | 121/168 | 0.89 (0.68-1.15)        | 25%                  | 23%    |
| >7 bone metastases                                                                                                                                                                                                                                                                                            | 333/379         | 322/386 | 0.85 (0.73-1.00)        | 11%                  | 13%    |
| <sup>a</sup> Hazard ratios and 95%CI are from Cox proportional hazards models adjusted for age (<70 or ≥70), N stage (N0, N+ or NX), WHO performance status (0 or 1-2), NSAID or aspirin use (uses either or no), docetaxel use (yes or no) and metastatic site (only NRLN, bone±NRLN or any visceral/other). |                 |         |                         |                      |        |
| Abbreviations: SOC – standard of care, RT – radiotherapy, HR – hazard ratio, CI – confidence interval, KM – Kaplan-Meier.                                                                                                                                                                                     |                 |         |                         |                      |        |

**eTable 5. Baseline characteristics of 1587 patients with bone metastases ( $\pm$ NRLN) and without visceral metastasis stratified by  $\leq 3$  and  $\geq 4$  bone metastases, by treatment.**

|                                  | $\leq 3$ Bone metastases ( $\pm$ NRLN)<br>(n=577) |     |                   |     | $\geq 4$ Bone metastases ( $\pm$ NRLN)<br>(n=1010) |     |                   |     |
|----------------------------------|---------------------------------------------------|-----|-------------------|-----|----------------------------------------------------|-----|-------------------|-----|
|                                  | SOC<br>(n=290)                                    |     | SOC+RT<br>(n=287) |     | SOC<br>(n=512)                                     |     | SOC+RT<br>(n=498) |     |
|                                  | n                                                 | %   | n                 | %   | n                                                  | %   | n                 | %   |
| <b>Age at randomisation</b>      |                                                   |     |                   |     |                                                    |     |                   |     |
| <b>Median</b>                    | 68                                                |     | 69                |     | 68                                                 |     | 68                |     |
| <b>IQR</b>                       | 64-73                                             |     | 63-73             |     | 63-73                                              |     | 63-73             |     |
| <b>PSA (ng/ml) before ADT</b>    |                                                   |     |                   |     |                                                    |     |                   |     |
| <b>Median</b>                    | 44                                                |     | 46                |     | 183                                                |     | 182               |     |
| <b>IQR</b>                       | 15-100                                            |     | 20-98             |     | 58-581                                             |     | 53-638            |     |
| <b>WHO performance status</b>    |                                                   |     |                   |     |                                                    |     |                   |     |
| <b>0</b>                         | 212                                               | 73  | 223               | 78  | 348                                                | 68  | 341               | 69  |
| <b>1 to 2</b>                    | 78                                                | 27  | 64                | 22  | 164                                                | 32  | 157               | 32  |
| <b>Primary tumour stage</b>      |                                                   |     |                   |     |                                                    |     |                   |     |
| <b><math>\leq T2</math></b>      | 39                                                | 13  | 26                | 9   | 40                                                 | 8   | 50                | 10  |
| <b>T3</b>                        | 182                                               | 63  | 177               | 62  | 273                                                | 53  | 277               | 56  |
| <b>T4</b>                        | 55                                                | 19  | 71                | 25  | 135                                                | 26  | 120               | 24  |
| <b>TX</b>                        | 14                                                | 5   | 13                | 5   | 64                                                 | 13  | 51                | 10  |
| <b>Gleason score</b>             |                                                   |     |                   |     |                                                    |     |                   |     |
| <b><math>\leq 7</math></b>       | 65                                                | 22  | 63                | 22  | 78                                                 | 15  | 74                | 15  |
| <b>8 to 10</b>                   | 218                                               | 75  | 216               | 75  | 418                                                | 82  | 405               | 81  |
| <b>Unknown</b>                   | 7                                                 | 2   | 8                 | 3   | 16                                                 | 3   | 19                | 4   |
| <b>Regional node status</b>      |                                                   |     |                   |     |                                                    |     |                   |     |
| <b>N0</b>                        | 136                                               | 47  | 127               | 44  | 175                                                | 34  | 177               | 36  |
| <b>N1</b>                        | 141                                               | 49  | 151               | 53  | 293                                                | 57  | 271               | 54  |
| <b>NX</b>                        | 13                                                | 5   | 9                 | 3   | 44                                                 | 9   | 50                | 10  |
| <b>Nominated RT schedule</b>     |                                                   |     |                   |     |                                                    |     |                   |     |
| <b>36Gy in 6f over 6 weeks</b>   | 126                                               | 43  | 119               | 42  | 235                                                | 46  | 270               | 54  |
| <b>55Gy in 20f over 4 weeks</b>  | 164                                               | 57  | 168               | 59  | 277                                                | 54  | 228               | 46  |
| <b>Planned Docetaxel use</b>     |                                                   |     |                   |     |                                                    |     |                   |     |
| <b>No</b>                        | 246                                               | 85  | 243               | 85  | 417                                                | 81  | 407               | 82  |
| <b>Yes</b>                       | 44                                                | 15  | 44                | 15  | 95                                                 | 19  | 91                | 18  |
| <b>Sites of metastases</b>       |                                                   |     |                   |     |                                                    |     |                   |     |
| <b>Bone</b>                      | 290                                               | 100 | 287               | 100 | 512                                                | 100 | 498               | 100 |
| <b>NRLN</b>                      | 44                                                | 15  | 46                | 16  | 120                                                | 53  | 105               | 47  |
| <b>Lung</b>                      | 0                                                 | 0   | 0                 | 0   | 0                                                  | 0   | 0                 | 0   |
| <b>Liver</b>                     | 0                                                 | 0   | 0                 | 0   | 0                                                  | 0   | 0                 | 0   |
| <b>Other</b>                     | 0                                                 | 0   | 0                 | 0   | 0                                                  | 0   | 0                 | 0   |
| <b>Number of bone metastases</b> |                                                   |     |                   |     |                                                    |     |                   |     |
| <b><math>\leq 3</math></b>       | 290                                               | 100 | 287               | 100 | 0                                                  | 0   | 0                 | 0   |
| <b>4 to 9</b>                    | 0                                                 | 0   | 0                 | 0   | 185                                                | 36  | 183               | 37  |
| <b><math>\geq 10</math></b>      | 0                                                 | 0   | 0                 | 0   | 327                                                | 64  | 315               | 63  |

**Abbreviations: NRLN- Non-regional lymph nodes., SOC – standard of care, RT – radiotherapy, IQR- inter-quartile range, PSA – prostate specific antigen, ADT – androgen deprivation therapy.**



**eTable 6. Summary of estimated treatment effects for each outcome measure, for all 1272 patients with only bone metastasis and in subgroups based on  $\leq 3$  and  $\geq 4$  bone metastases.**

|                                                                                                                                                                                                                                                                                                                                                                                                                                                                                         | Events/patients |         | HR (95% CI) <sup>a</sup> | 3 year KM survival % |         | Interaction p value |
|-----------------------------------------------------------------------------------------------------------------------------------------------------------------------------------------------------------------------------------------------------------------------------------------------------------------------------------------------------------------------------------------------------------------------------------------------------------------------------------------|-----------------|---------|--------------------------|----------------------|---------|---------------------|
|                                                                                                                                                                                                                                                                                                                                                                                                                                                                                         | SOC             | SOC+ RT |                          | SOC                  | SOC+ RT |                     |
| <b>Overall survival</b>                                                                                                                                                                                                                                                                                                                                                                                                                                                                 |                 |         |                          |                      |         |                     |
| Only bone metastasis                                                                                                                                                                                                                                                                                                                                                                                                                                                                    | 230/638         | 229/634 | 0.94 (0.79 - 1.13)       | 63%                  | 67%     | 0.044               |
| $\leq 3$ bone metastases                                                                                                                                                                                                                                                                                                                                                                                                                                                                | 63/246          | 48/241  | 0.67 (0.46 - 0.97)       | 77%                  | 86%     |                     |
| $\geq 4$ bone metastases                                                                                                                                                                                                                                                                                                                                                                                                                                                                | 167/392         | 181/393 | 1.07 (0.87 - 1.32)       | 54%                  | 56%     |                     |
| <b>Failure-free survival</b>                                                                                                                                                                                                                                                                                                                                                                                                                                                            |                 |         |                          |                      |         |                     |
| Only bone metastasis                                                                                                                                                                                                                                                                                                                                                                                                                                                                    | 463/638         | 420/634 | 0.75 (0.65 - 0.85)       | 24%                  | 33%     | 0.013               |
| $\leq 3$ bone metastases                                                                                                                                                                                                                                                                                                                                                                                                                                                                | 150/246         | 108/241 | 0.56 (0.44 - 0.72)       | 36%                  | 56%     |                     |
| $\geq 4$ bone metastases                                                                                                                                                                                                                                                                                                                                                                                                                                                                | 313/392         | 312/393 | 0.85 (0.72 - 0.99)       | 16%                  | 17%     |                     |
| <p><sup>a</sup> Hazard ratios and 95%CI are from Cox proportional hazards models adjusted for minimisation factors used at randomisation: age (&lt;70 or <math>\geq 70</math>), WHO performance status (0 or 1-2), N stage (N0, N+ or NX), NSAID or aspirin use (uses either or no) and docetaxel use (yes or no).</p> <p>Abbreviations: SOC – standard of care, RT – radiotherapy, HR – hazard ratio, CI – confidence interval, KM – Kaplan-Meier, NRLN – non-regional lymph node.</p> |                 |         |                          |                      |         |                     |

**eTable 7. Baseline characteristics of 181 patients with only non-regional lymph node metastasis (M1a), by treatment.**

|                               | Only NRLN (n=181) |     |               |     |
|-------------------------------|-------------------|-----|---------------|-----|
|                               | SOC (n=89)        |     | SOC+RT (n=92) |     |
|                               | n                 | %   | n             | %   |
| <b>Age at randomisation</b>   |                   |     |               |     |
| Median                        | 66                |     | 68            |     |
| IQR                           | 63-72             |     | 63-72         |     |
| <b>PSA (ng/ml) before ADT</b> |                   |     |               |     |
| Median                        | 64                |     | 92            |     |
| IQR                           | 27-151            |     | 33-197        |     |
| <b>WHO performance status</b> |                   |     |               |     |
| 0                             | 73                | 82  | 68            | 74  |
| 1 to 2                        | 16                | 18  | 24            | 26  |
| <b>Primary tumour stage</b>   |                   |     |               |     |
| ≤T2                           | 6                 | 7   | 9             | 10  |
| T3                            | 56                | 63  | 65            | 71  |
| T4                            | 26                | 29  | 15            | 16  |
| TX                            | 1                 | 1   | 3             | 3   |
| <b>Gleason score</b>          |                   |     |               |     |
| ≤7                            | 6                 | 7   | 16            | 17  |
| 8 to 10                       | 80                | 90  | 69            | 75  |
| Unknown                       | 3                 | 3   | 7             | 8   |
| <b>Regional node status</b>   |                   |     |               |     |
| N0                            | 4                 | 4   | 5             | 5   |
| N1                            | 83                | 93  | 87            | 95  |
| NX                            | 2                 | 2   | 0             | 0   |
| <b>Nominated RT schedule</b>  |                   |     |               |     |
| 36Gy in 6f over 6 weeks       | 45                | 51  | 34            | 37  |
| 55Gy in 20f over 4 weeks      | 44                | 49  | 58            | 63  |
| <b>Planned Docetaxel use</b>  |                   |     |               |     |
| No                            | 72                | 81  | 75            | 82  |
| Yes                           | 17                | 19  | 17            | 18  |
| <b>Sites of metastases</b>    |                   |     |               |     |
| NRLN                          | 89                | 100 | 92            | 100 |
| Bone                          | 0                 | 0   | 0             | 0   |
| Lung                          | 0                 | 0   | 0             | 0   |
| Liver                         | 0                 | 0   | 0             | 0   |
| Other                         | 0                 | 0   | 0             | 0   |

Abbreviations: NRLN- Non-regional lymph node, SOC – Standard of care, RT – radiotherapy, IQR- inter-quartile range, PSA – prostate specific antigen, ADT – androgen deprivation therapy.

**eTable 8. Baseline characteristics of 171 patients with any visceral or other metastasis, by treatment arms.**

|                                                                                                                                                                                           | Any visceral/other metastasis (n=171) |    |               |    |
|-------------------------------------------------------------------------------------------------------------------------------------------------------------------------------------------|---------------------------------------|----|---------------|----|
|                                                                                                                                                                                           | SOC (n=85)                            |    | SOC+RT (n=86) |    |
|                                                                                                                                                                                           | n                                     | %  | n             | %  |
| <b>Age at randomisation</b>                                                                                                                                                               |                                       |    |               |    |
| Median                                                                                                                                                                                    | 68                                    |    | 69            |    |
| IQR                                                                                                                                                                                       | 63-72                                 |    | 62-74         |    |
| <b>PSA (ng/ml) before ADT</b>                                                                                                                                                             |                                       |    |               |    |
| Median                                                                                                                                                                                    | 131                                   |    | 124           |    |
| IQR                                                                                                                                                                                       | 48-421                                |    | 36-373        |    |
| <b>WHO performance status</b>                                                                                                                                                             |                                       |    |               |    |
| 0                                                                                                                                                                                         | 62                                    | 73 | 57            | 66 |
| 1 to 2                                                                                                                                                                                    | 23                                    | 27 | 29            | 34 |
| <b>Primary tumour stage</b>                                                                                                                                                               |                                       |    |               |    |
| ≤T2                                                                                                                                                                                       | 4                                     | 5  | 9             | 10 |
| T3                                                                                                                                                                                        | 44                                    | 52 | 44            | 51 |
| T4                                                                                                                                                                                        | 30                                    | 35 | 26            | 30 |
| TX                                                                                                                                                                                        | 7                                     | 8  | 7             | 8  |
| <b>Gleason score</b>                                                                                                                                                                      |                                       |    |               |    |
| ≤7                                                                                                                                                                                        | 12                                    | 14 | 12            | 14 |
| 8 to 10                                                                                                                                                                                   | 65                                    | 76 | 67            | 78 |
| Unknown                                                                                                                                                                                   | 8                                     | 9  | 7             | 8  |
| <b>Regional node status</b>                                                                                                                                                               |                                       |    |               |    |
| N0                                                                                                                                                                                        | 17                                    | 20 | 20            | 23 |
| N1                                                                                                                                                                                        | 65                                    | 76 | 60            | 70 |
| NX                                                                                                                                                                                        | 3                                     | 4  | 6             | 7  |
| <b>Nominated RT schedule</b>                                                                                                                                                              |                                       |    |               |    |
| 36Gy in 6f over 6 weeks                                                                                                                                                                   | 41                                    | 48 | 36            | 42 |
| 55Gy in 20f over 4 weeks                                                                                                                                                                  | 44                                    | 52 | 50            | 58 |
| <b>Planned Docetaxel use</b>                                                                                                                                                              |                                       |    |               |    |
| No                                                                                                                                                                                        | 69                                    | 81 | 67            | 78 |
| Yes                                                                                                                                                                                       | 16                                    | 19 | 19            | 22 |
| <b>Sites of metastases</b>                                                                                                                                                                |                                       |    |               |    |
| Bone                                                                                                                                                                                      | 70                                    | 82 | 75            | 87 |
| NRLN                                                                                                                                                                                      | 23                                    | 27 | 34            | 40 |
| Lung                                                                                                                                                                                      | 36                                    | 42 | 41            | 48 |
| Liver                                                                                                                                                                                     | 22                                    | 26 | 18            | 20 |
| Other                                                                                                                                                                                     | 34                                    | 40 | 32            | 37 |
| <b>Number of bone metastases</b>                                                                                                                                                          |                                       |    |               |    |
| ≤3                                                                                                                                                                                        | 38                                    | 45 | 30            | 35 |
| 4 to 9                                                                                                                                                                                    | 19                                    | 22 | 20            | 23 |
| ≥10                                                                                                                                                                                       | 28                                    | 33 | 36            | 42 |
| Abbreviations: SOC – Standard of care, RT – radiotherapy, IQR- inter-quartile range, PSA – prostate specific antigen, ADT – androgen deprivation therapy, NRLN- Non-regional lymph nodes. |                                       |    |               |    |

**eTable 9. Summary of treatment effects for each outcome measure by the newly devised metastatic burden criteria. Low metastatic burden is defined as patients with only NRLN metastasis or  $\leq 3$  bone metastases ( $\pm$ NRLN) and without any visceral or other metastasis.**

|                                                      | Events/Patients |         | HR (95%CI) <sup>a</sup> | Interaction by metastatic burden p-value | Restricted mean survival time (months) <sup>b</sup> |        |                     | 3-year survival <sup>b</sup> |        |
|------------------------------------------------------|-----------------|---------|-------------------------|------------------------------------------|-----------------------------------------------------|--------|---------------------|------------------------------|--------|
|                                                      | SOC             | SOC+RT  |                         |                                          | SOC                                                 | SOC+RT | Difference (95% CI) | SOC                          | SOC+RT |
| <b>Overall survival</b>                              |                 |         |                         |                                          |                                                     |        |                     |                              |        |
| Low burden                                           | 109/379         | 79/379  | 0.62 (0.46 - 0.83)      | 0.003                                    | 45.1                                                | 49.6   | 4.5 (1.9 - 7.0)     | 74%                          | 82%    |
| High burden                                          | 259/597         | 268/584 | 1.08 (0.91 - 1.28)      |                                          | 39.2                                                | 37.9   | -1.3 (-3.8 - 1.2)   | 55%                          | 54%    |
| <b>Failure-free survival</b>                         |                 |         |                         |                                          |                                                     |        |                     |                              |        |
| Low burden                                           | 238/379         | 181/379 | 0.57 (0.47 - 0.70)      | 0.002                                    | 27.9                                                | 37.1   | 9.2 (5.9 - 12.4)    | 34%                          | 52%    |
| High burden                                          | 482/597         | 461/584 | 0.87 (0.76 - 0.99)      |                                          | 17.4                                                | 19.1   | 1.7 (-0.3 - 3.6)    | 17%                          | 19%    |
| <b>Progression-free survival</b>                     |                 |         |                         |                                          |                                                     |        |                     |                              |        |
| Low burden                                           | 157/379         | 129/379 | 0.72 (0.57 - 0.92)      | 0.004                                    | 39.3                                                | 43.7   | 4.4 (1.3 - 7.5)     | 57%                          | 66%    |
| High burden                                          | 366/597         | 385/584 | 1.10 (0.95 - 1.27)      |                                          | 28.6                                                | 26.6   | -2.0 (-4.6 - 0.6)   | 36%                          | 31%    |
| <b>Metastatic progression-free survival</b>          |                 |         |                         |                                          |                                                     |        |                     |                              |        |
| Low burden                                           | 144/379         | 120/379 | 0.74 (0.58 - 0.94)      | 0.009                                    | 40.9                                                | 44.8   | 3.9 (1.1 - 6.7)     | 61%                          | 68%    |
| High burden                                          | 351/597         | 370/584 | 1.11 (0.96 - 1.28)      |                                          | 29.9                                                | 27.8   | -2.1 (-4.7 - 0.5)   | 38%                          | 33%    |
| <b>Prostate cancer-specific survival<sup>b</sup></b> |                 |         |                         |                                          |                                                     |        |                     |                              |        |
| Low burden                                           | 81/379          | 56/379  | 0.60 (0.43 - 0.86)      | 0.005                                    | 48.5                                                | 52.3   | 3.8 (1.4 - 6.2)     | 79%                          | 88%    |
| High burden                                          | 229/597         | 240/584 | 1.10 (0.92 - 1.32)      |                                          | 40.9                                                | 39.4   | -1.6 (-3.9 - 0.7)   | 58%                          | 57%    |

Hazard ratios and restricted means survival time differences are for prostate radiotherapy relative to control.

Low burden is defined as patients with only NRLN metastasis or  $\leq 3$  bone metastases ( $\pm$ NRLN) and no visceral or other metastasis.

<sup>a</sup> Hazard ratios and 95%CI are from Cox proportional hazards models adjusted for age (<70 or  $\geq 70$ ), N stage (N0, N+ or NX), WHO performance status (0 or 1-2), NSAID or aspirin use (uses either or no), docetaxel use (yes or no) and stratified by time period.

<sup>b</sup> Survival probabilities and restricted mean survival time estimates are taken from flexible parametric models (t-star, 59 months).

<sup>c</sup> Sub-distribution hazard ratios and 95%CI are from Fine and Grey Competing risk regression adjusted for variables as stated above.

Abbreviations: SOC – standard of care, RT – radiotherapy, HR – hazard ratio, CI – confidence interval, NRLN-non-regional lymph node metastasis.

**eFigure 1. Hazard ratios and 95% confidence intervals for overall and failure-free survival in non-overlapping sub-populations based on bone metastases counts for 1939 patients.**

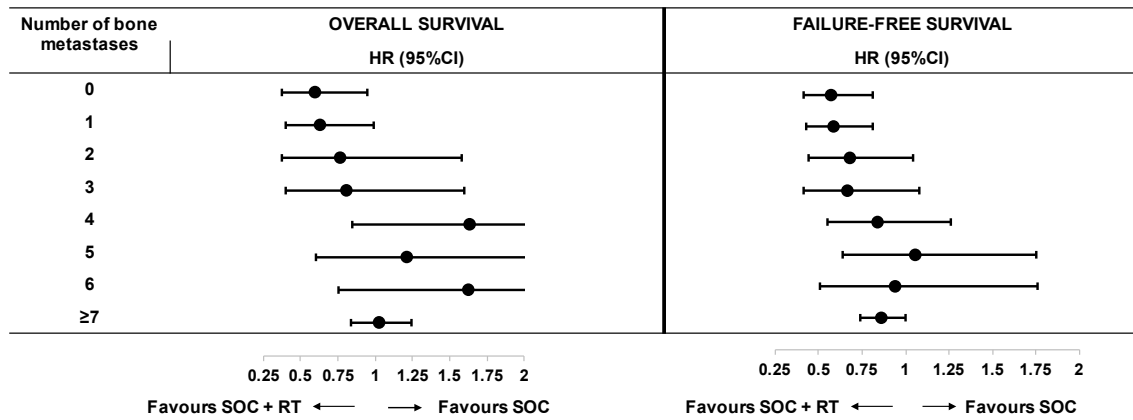

**Figure 2. Kaplan-Meier estimated 3-year (A) overall and (B) failure free survival in non-overlapping sub-populations based on bone metastasis counts for 1939 patients.**

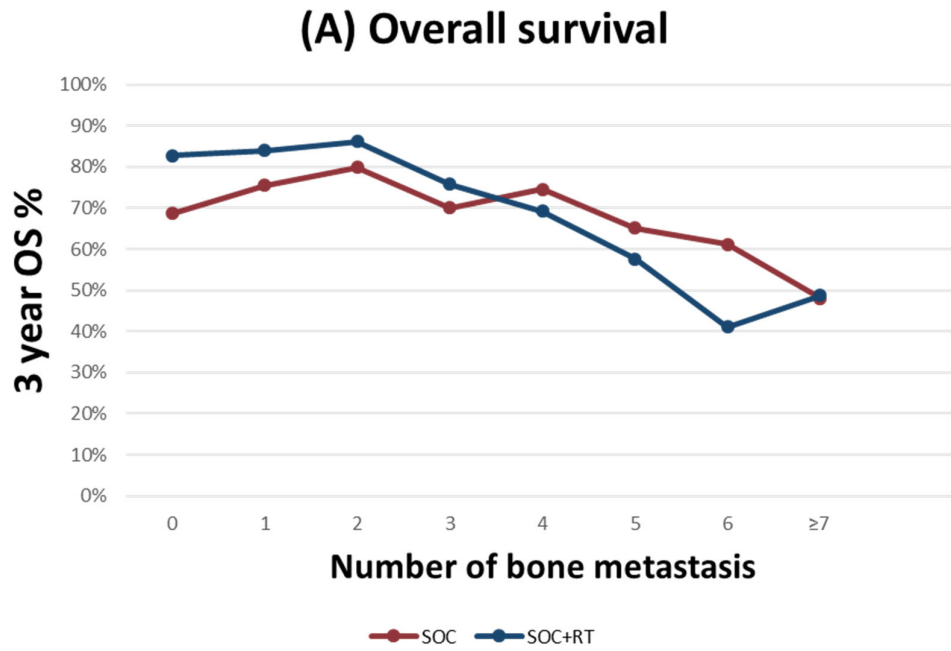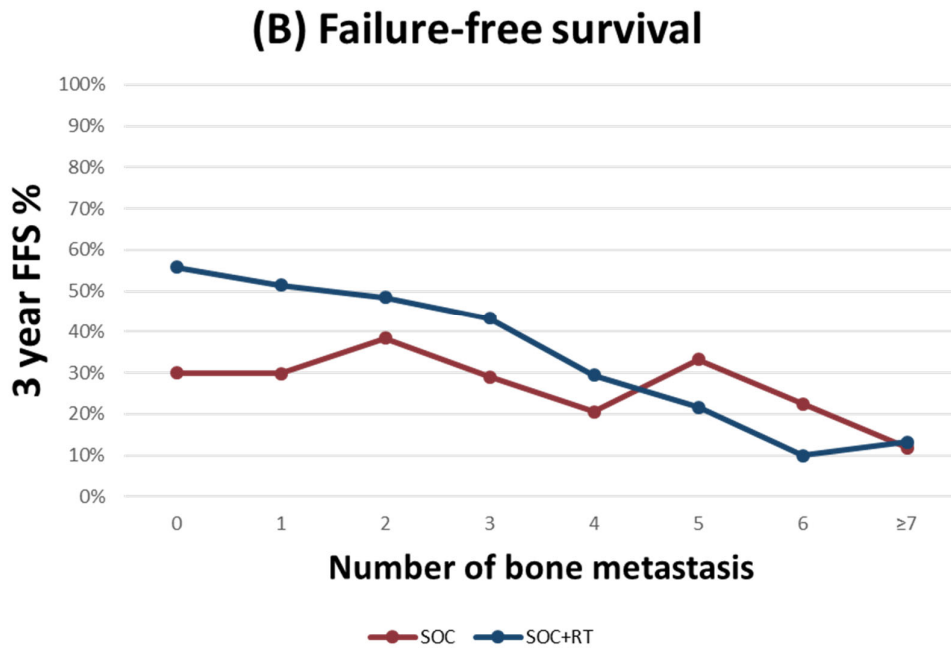

**Figure 3. Kaplan-Meier curves for overall and failure-free survival by treatment in 1272 patients with only bone metastasis and no non-regional lymph node/visceral/other metastasis stratified by (A,B)  $\leq 3$  and (C,D)  $\geq 4$  bone metastases. SOC- standard of care, RT-radiotherapy.**

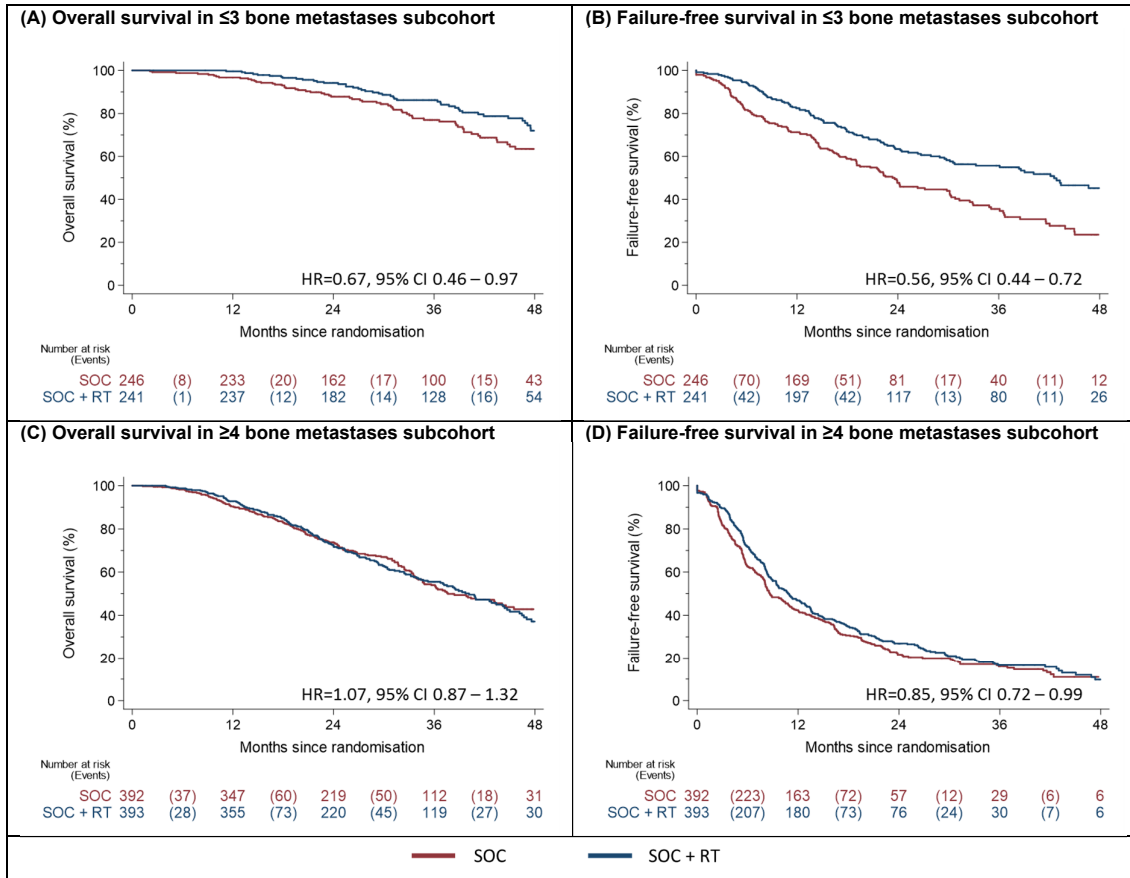

**Figure 4. Kaplan-Meier curves for overall and failure-free survival in the newly devised (A,B) low and (C,D) high metastatic burden subgroups. Low metastatic burden is defined as patients with only NRLN metastasis or  $\leq 3$  bone metastases ( $\pm$ NRLN) and without any visceral or other metastasis. SOC- standard of care, RT-radiotherapy.**

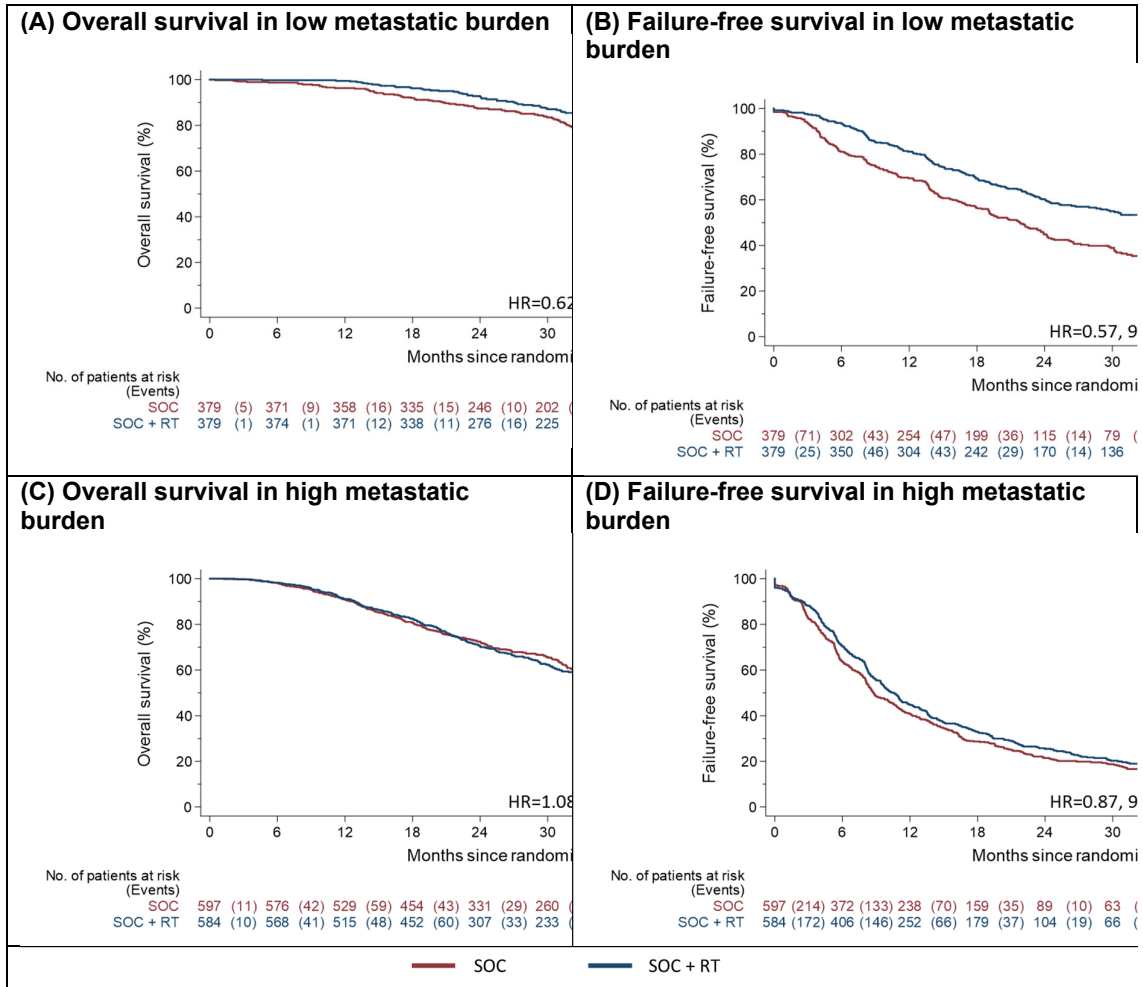



**Figure 5. Effect of prostate radiotherapy on overall survival across baseline factors in low and high metastatic burden subgroups. Low burden is defined as patients with only NRLN metastasis or  $\leq 3$  bone metastases ( $\pm$ NRLN) and without any visceral or other metastasis. Solid vertical line indicates a hazard ratio of 1, dotted line indicates the hazard ratios for overall survival within low and high metastatic burden subgroups.**

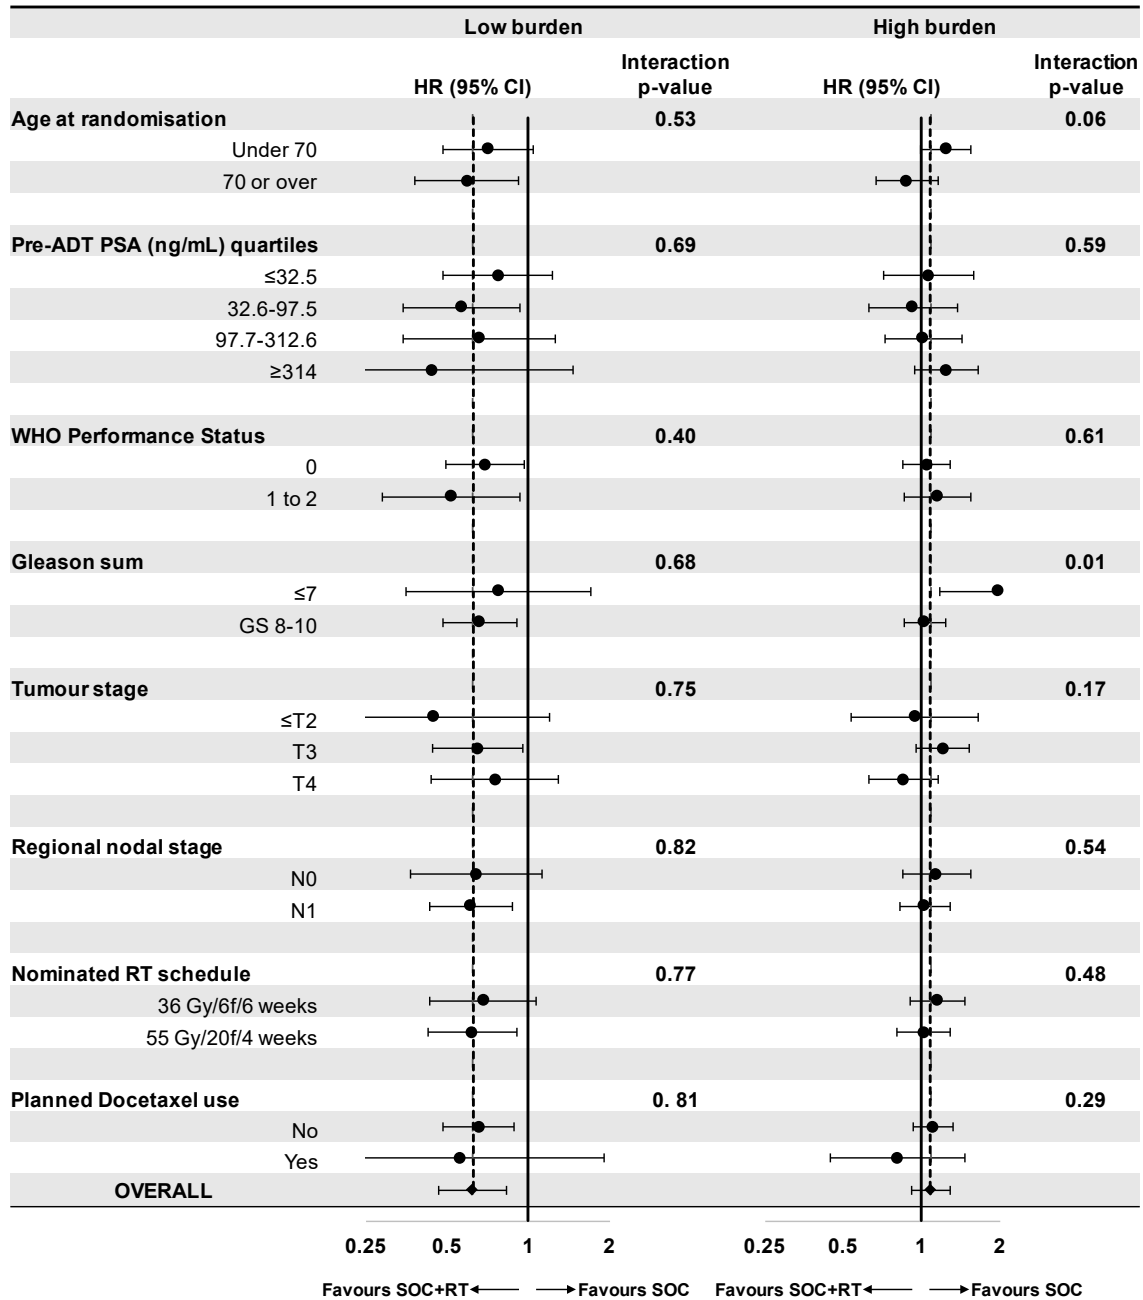

**Figure 6. Effect of prostate radiotherapy on failure-free survival across baseline factors in low and high metastatic burden subgroups. Low burden is defined as patients with only NRLN metastasis or  $\leq 3$  bone metastases ( $\pm$ NRLN) and no visceral or other metastasis. Solid vertical line indicates a hazard ratio of 1, dotted line indicates the hazard ratios for failure-free survival within low and high metastatic burden subgroups.**

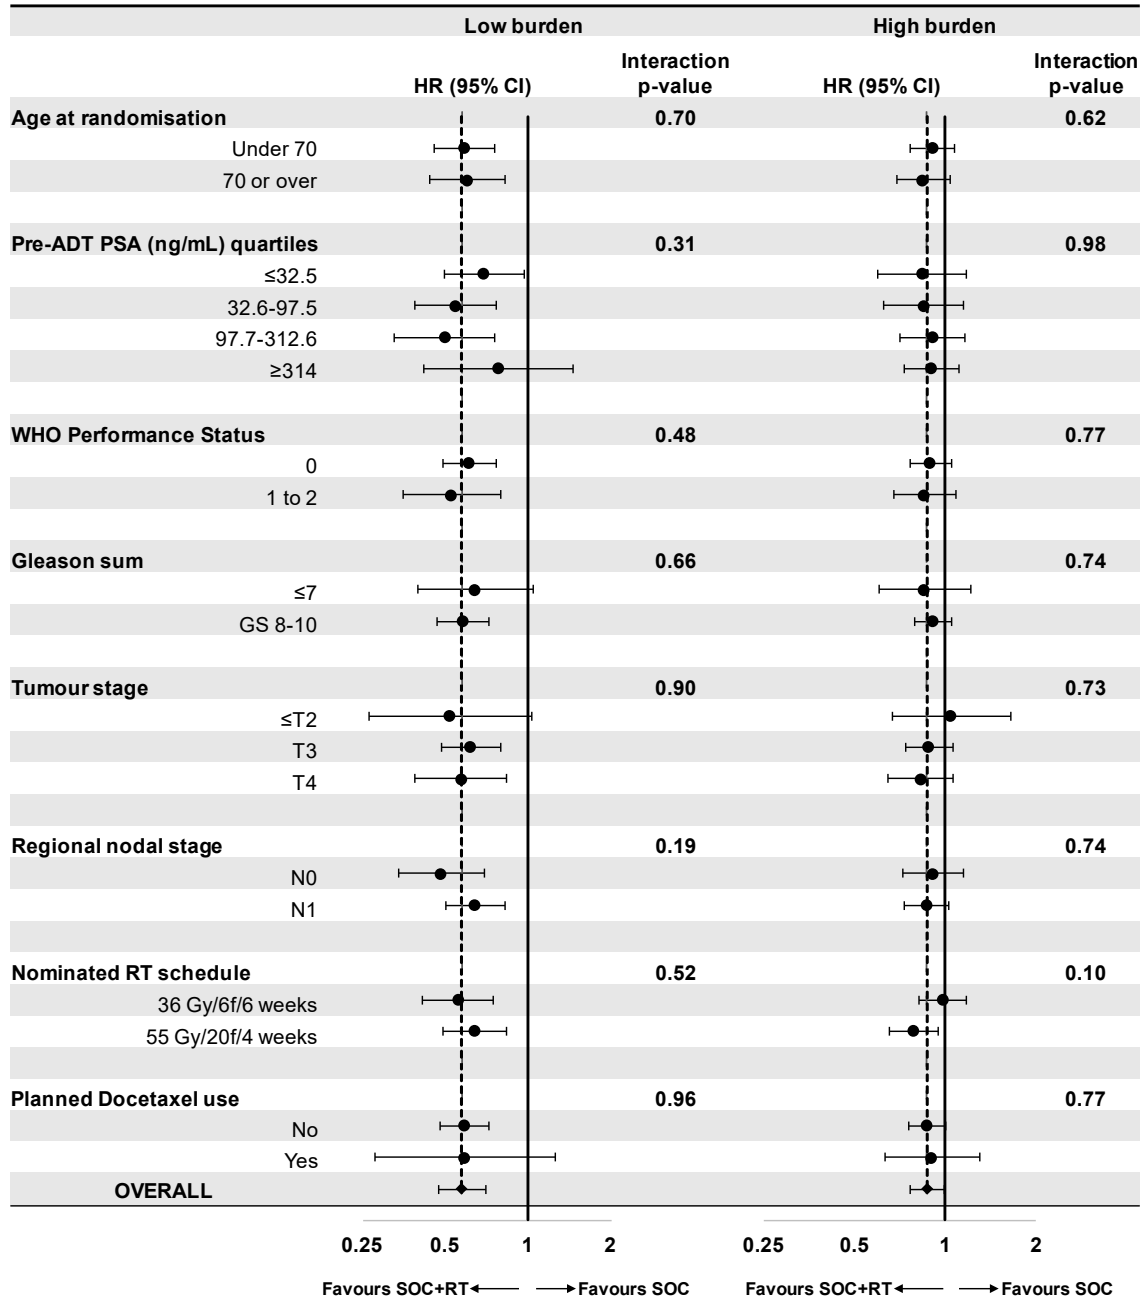

## eReferences.

1. Parker CC, James ND, Brawley CD, et al. Radiotherapy to the primary tumour for newly diagnosed, metastatic prostate cancer (STAMPEDE): a randomised controlled phase 3 trial. *Lancet*. 2018;392(10162):2353-2366.
2. Royston P, Sauerbrei W. A new approach to modelling interactions between treatment and continuous covariates in clinical trials by using fractional polynomials. *Stat Med*. 2004;23(16):2509-25.
3. Royston P, Altman DG. Regression Using Fractional Polynomials of Continuous Covariates: Parsimonious Parametric Modelling. *Journal of the Royal Statistical Society Series C (Applied Statistics)*. 1994;43(3):429-467.
4. Farewell VT, Tom BDM, Royston P. The Impact of Dichotomization on the Efficiency of Testing for an Interaction Effect in Exponential Family Models. *Journal of the American Statistical Association*. 2004;99(467):822-831.
5. Altman DG, Lausen B, Sauerbrei W, Schumacher M. Dangers of using "optimal" cutpoints in the evaluation of prognostic factors. *J Natl Cancer Inst*. 1994;86(11):829-35.
6. Royston P, Sauerbrei W. *Multivariable model-building : a pragmatic approach to regression analysis based on fractional polynomials for modelling continuous variables*. New York: John Wiley; 2008.
7. Schwarz G. Estimating the Dimension of a Model. *Ann Statist*. 1978;6(2):461-464.
8. Akaike H. A new look at the statistical model identification. *IEEE transactions on automatic control*. 1974;19(6):716-723.
9. Volinsky CT, Raftery AE. Bayesian information criterion for censored survival models. *Biometrics*. 2000;56(1):256-62.
10. Raftery AE. Bayesian Model Selection in Social Research. *Sociological Methodology*. 1995;25:111-163.
11. Royston P, Parmar MK. The use of restricted mean survival time to estimate the treatment effect in randomized clinical trials when the proportional hazards assumption is in doubt. *Stat Med*. 2011;30(19):2409-21.
12. Fine JP, Gray RJ. A Proportional Hazards Model for the Subdistribution of a Competing Risk. *Journal of the American Statistical Association*. 1999;94(446):496-509.
