# Supplementary material for: Association of Bone Metastatic Burden With Survival Benefit From Prostate Radiotherapy in Patients With Newly Diagnosed Metastatic Prostate Cancer: A Secondary Analysis of a Randomized Clinical Trial
Source: PubMed Central journal article supplement (PMC7893550; doi:10.1001/jamaoncol.2020.7857), 2021-02-18
Supplement: jamaoncol-e207857-s003.pdf [file jamaoncol-e207857-s003.pdf]

## Data Sharing Statement

Ali. Association of Bone Metastatic Burden With Survival Benefit From Prostate Radiotherapy in Patients With Newly Diagnosed Metastatic Prostate Cancer. *JAMA Oncol.* Published February 18, 2021.

doi:10.1001/jamaoncol.2020.7857

### Data

**Data available:** No

### Additional Information

**Explanation for why data not available:** Patients enrolled in the trial did not provide informed consent for the data to be shared publicly. Therefore, data from the trial will not be shared publicly.
